# Supplementary material
Source: PubMed Central journal article supplement (PMC5137763)
Supplement: pnas.1605365113.sapp.pdf [file pnas.1605365113.sapp.pdf]

# SI Appendix

## Temperature response of soil respiration largely unaltered with experimental warming

**Authors:** Joanna C. Carey, Jianwu Tang, Pamela H. Templer, Kevin D. Kroeger, Thomas W. Crowther, Andrew Burton, Jeffrey S. Dukes, Bridget Emmett, Serita Frey, Mary Heskel, Lifen Jiang, Megan Machmuller, Jacqueline E. Mohan, Anne Marie Panetta, Peter B. Reich, Sabine Reinsch, Xin Wang, Steven D. Allison, Chris Bamming, Scott D. Bridgman, Scott L. Collins, Giovanbattista de Dato, William C. Eddy, Brian J. Enquist, Marc Estiarte, John Harte, Amanda Henderson, Bart R. Johnson, Klaus S. Larsen, Yiqi Luo, Sven Marhan, Jerry Melillo, Josep Peñuelas, Laurel Pfeifer-Meister, Christian Poll, Edward B. Rastetter, Andy Reinmann, Lorien L. Reynolds, Inger K. Schmidt, Gaius R. Shaver, Aaron L. Strong, Vidya Suseela, Albert Tietema

### Supporting Methods

#### *Dataset Generation and Description*

A literature search was conducted on September 22, 2014 using Web of Science, which produced five studies presenting non-aggregated instantaneous data that were extractable (Table S1). Published datasets (16-17) and unpublished values make up the majority of the data in the dataset. We obtained unpublished data by first creating a list of all known experimental warming studies globally and asking the principal investigators to supply soil respiration data with corresponding soil temperature and moisture values. Because of widely variable experimental designs across studies, we averaged all plot-scale values for each sampling event to obtain one average ( $\pm$  SD) for each treatment for each sampling event ('sampling events' typically refer to a single day of sampling, although several studies complete full suites of sampling (i.e., 'sampling events') from all plots in both morning and afternoon). Only soil respiration values with corresponding soil moisture and soil temperature values from experimental warming studies were included in our analysis. Only observations from single-factor treatments (i.e., warming) were used, excluding values that combined warming with other treatments (e.g., precipitation or nitrogen manipulation). Four studies included more than one level of warming treatment (e.g., both 1.5 and 3°C warming treatments); in these cases, data from all levels of warming were used for our temperature response function analyses. All data were reported as instantaneous change in CO<sub>2</sub> efflux over a fixed

32 area, with belowground (i.e., roots and rhizomes), but not aboveground vegetation, included. Thus, soil  
33 respiration values presented here include both heterotrophic and autotrophic soil respiration.

34

35 Experiment locations ranged from 33.5 to 68.4 °N latitude (Fig. S5) and the duration of warming at  
36 experiments ranged from <1 to 22 years (average 5.1 years) (Fig. S6). Depths of soil temperature (1-10  
37 cm) and moisture measurements (5-30 cm) ranged across studies, but were always consistent between  
38 warmed and control plots within a particular study. The majority of the observations were taken between  
39 5 and 10 years after warming commenced (n=1534), followed by 2-5 year duration (n=1109), less than 2  
40 years (n=896) and >10 years (n=278). Each site was classified into a particular biome (grassland, northern  
41 shrubland (i.e., peatlands and heathlands), southern shrubland (i.e., Mediterranean or sub-tropical  
42 shrublands), tundra, desert, meadow, temperate agriculture, temperate forest and boreal forest) by the  
43 associated principal investigator. Tropical biomes are not represented in our analysis because no data  
44 from experimental warming studies in the tropics are yet available. However, the first known tropical  
45 warming experiment, Tropical Responses to Altered Climate Experiment (TRACE), is currently being set  
46 up in Luquillo Experimental Forest in Puerto Rico, with heating scheduled to commence during spring  
47 2016.

48

49 Seasonality was defined by principal investigators contributing data as those months that fall into the  
50 following categories: growing (plants actively growing), non-growing (plants not actively growing), or  
51 shoulder (takes into account months of transition and intra-annual variability) season. Data from the  
52 growing season accounted for more than half of our observations (n=1840), followed by shoulder season  
53 (n=1112), and non-growing season (n=865). Absolute differences in soil temperature, moisture, and  
54 respiration across sites were always calculated as values from warmed plots minus values from control  
55 plots for each sampling event: e.g.,  $\Delta T = T_w - T_c$ .

56

57 *Evaluating role of Soil Moisture, Seasonality, and Warming Duration in Controlling Soil Respiration*

58 We investigated the role of soil moisture in controlling the response of soil respiration in four ways. First,  
59 we evaluated the significance of soil moisture as a predictor of soil respiration by adding moisture as an  
60 additional continuous variable in a multiple linear regression model (Model e in Table S3, Table S2):

61

$$62 \quad (3) \quad \ln(R) = a_0 + a_1T + a_2T^2 + a_3M$$

63

64 where  $R$  is soil respiration ( $\mu\text{mol C m}^2 \text{ s}^{-1}$ ),  $T$  is soil temperature ( $^{\circ}\text{C}$ ), and  $M$  is soil moisture ( $\text{cm}^3 \text{ cm}^{-3}$ ).

65 In cases where significant differences in the response functions of warmed vs. control treatments were  
66 observed (boreal and desert biomes), separate models that included moisture were run for each treatment  
67 (Table S2). Because respiration rates are often not linearly related to moisture content, we also conducted  
68 our analysis with an additional model (Eq. 4), which resulted in no differences in our conclusions (Table  
69 S6). Next, we created partial regression plots (i.e., added-variable plots) for both temperature and  
70 moisture (Fig. S7), allowing for visual inspection of the role of moisture compared to temperature in  
71 controlling the respiration response. Third, we examined how moisture alters the temperature sensitivity  
72 of respiration by running a separate model of respiration as a function of temperature with moisture as the  
73 interaction term (Model f in Table S3). To evaluate this response visually, we then partitioned the data  
74 into moisture quantiles and plotted the temperature sensitivities of respiration at these four different  
75 moisture levels (Fig. S3), reporting the coefficients in Table S4. Finally, we normalized each  
76 instantaneous difference in respiration between warmed and control plots ( $\Delta R$ ) by  $\Delta T$ , and binned those  
77 values by amount of moisture available in warmed plots as a fraction of control plots (Fig. 3). Moisture  
78 bins containing less than 5% of total observations from each biome are not shown (not applicable in Fig.  
79 3, where all bins represent at least 5% total data). This analysis allowed us to understand how differences  
80 in the magnitude of respiration between treatments change with moisture availability (Fig. S3).

81

82 We evaluated the influence of warming duration and seasonality on the respiration response between  
83 treatments in two ways: 1) by partitioning the observations into categories of warming duration (<2, 2-5,  
84 5-10, and >10 years) and season (growing, non-growing, and shoulder) and running the multivariate  
85 regression model shown in Table 1 for each category separately, and 2) by running additional multivariate  
86 models (Models h and i in Table S3) that included duration or season as a fixed factor, with an interaction  
87 with warming treatment.

88

## 89 **Supporting Results**

### 90 *Magnitudes of Temperature and Respiration Change with Experimental Warming*

91 Experimental warming generally stimulated soil respiration, with a larger  $\Delta T$  significantly correlated to a  
92 larger respiration effect size ( $p < 0.01$  and  $r = 0.66$ ; Fig. S2B, Table S1). Across all sites, experimental  
93 warming increased soil temperatures by  $1.91\text{ }^{\circ}\text{C}$  on average, although average soil warming by biome  
94 ranged from  $0^{\circ}\text{C}$  in southern shrublands to  $4.09\text{ }^{\circ}\text{C}$  in temperate forests, with relatively large inter-biome  
95 differences (Table S1). On average, the magnitude of soil warming at many sites was too low (when  $\Delta T$   
96  $< 1.72\text{ }^{\circ}\text{C}$ ) to statistically increase respiration rates (Fig. S2B). In turn, the relatively low degree of average  
97 warming across many sites resulted in an insignificant grand mean effect size for soil respiration ( $RR =$   
98  $0.05$  [95% CI:  $-0.03$ - $0.14$ ],  $n = 26$ ), regardless of season and warming duration, with just five sites (Site  
99 IDs 2, 6, 7, 8, 27 Table S1) having a significantly positive response of respiration in the warmed plots.  
100 Methodological differences in warming methods resulted in a range of  $\Delta T$ , and thus,  $\Delta R$  across sites. In  
101 our dataset, experiments that warmed via electric cables observed the greatest average soil warming ( $\Delta T$   
102  $= 3.6\text{ }^{\circ}\text{C}$ ,  $n = 5$ ), compared to infrared ( $\Delta T = 2.3\text{ }^{\circ}\text{C}$ ,  $n = 11$ ) and passive ( $\Delta T = 0.4\text{ }^{\circ}\text{C}$ ,  $n = 11$ ) warming  
103 methods. Electric cable was the dominant warming method in the temperate forest (4 out of 5 sites) and  
104 temperate agriculture (one site) biomes and in turn, these biomes were the only ones when analyzed  
105 individually to display a significant increase in respiration ( $\Delta R$ ) with warming using traditional meta-  
106 analysis (temperate forest:  $RR = 0.18$ ; 95% CI:  $0.06$ - $0.30$ , temperate agriculture:  $RR = 0.21$ ; 95% CI:  $0.06$ -  
107  $0.37$ ).

108

### 109 *Standardized Mean Difference of Temperature Sensitivity*

110 Beyond investigating differences in the log-quadratic temperature response function (Eq. 1) between  
111 warming treatments, we also conducted a traditional meta-analysis on site-level temperature sensitivity  
112 parameters using the standardized mean difference (SMD) as our index of effect size, which normalizes  
113 raw mean differences by the pooled standard deviation. Examining data from across all sites, the grand  
114 mean effect size was not significantly different from zero (SMD= -0.29 [95% CI: -1.21, 0.64], n=27),  
115 demonstrating further evidence for the general lack of difference in temperature sensitivities between  
116 warmed and control plots with experimental warming (Fig. S8). Although the grand mean effect size was  
117 not significantly different from zero, 12 sites showed significantly higher SMDs of temperature  
118 sensitivity in warmed plots (Site IDs 5, 8, 9, 13, 14,16, 19, 21, 23, 26-28), while eight sites (Site ID 1, 2,  
119 11, 12, 15, 20, 22, 24) demonstrated significantly lower SMD in warmed plots compared to control plots.

120

### 121 *Role of Moisture in Controlling Respiration Rates*

122 Meta-analysis of soil moisture data reveals that moisture was significantly reduced with warming (RR=  
123 0.08, [95% CI:-0.12- -0.03]), with 7 out of 27 sites having significantly less soil moisture at the warmed  
124 compared to control plots. However, such decreases were only marginally significantly correlated with  
125  $\Delta T$  ( $r= -0.32$ ,  $p=0.08$ ) (Fig. S2A). Multivariate linear regression highlights that moisture typically  
126 explains a much smaller fraction (0-8%) of the total respiration response compared to temperature (34-  
127 82%), except in the case of southern shrublands, where moisture is a stronger predictor of respiration than  
128 soil temperature ( $R^2$  model a or b versus Model e in Table S3, Fig. S7). We used partial regression plots  
129 (Fig. S7) to help visualize the effect of adding an additional variable (i.e., soil moisture) to a multiple  
130 regression model. Partial regression with temperature and moisture highlight the more important role of  
131 temperature in driving the soil respiration response compared to moisture (Fig. S7). This response is  
132 demonstrated by the lower slopes on the added-variable moisture plots (right hand panels). An exception  
133 to this is southern shrublands, where moisture added-variable plot has a much steeper slope compared to

134 other biomes, aligning with the multivariate regression output showing moisture playing a more important  
135 role in predicting respiration compared to temperature in the southern shrublands.

136

137 Ambient soil moisture is a critical factor in mitigating the respiration-temperature relationship. For  
138 example, a negative  $\Delta R/\Delta T$  response with soil drying is only apparent in the desert, grassland, and  
139 southern shrubland biomes (Fig. S9), likely because these biomes have the lowest ambient soil moisture  
140 content (Table S1) and thus, even minor desiccation with warming suppresses C fluxes. On the other  
141 hand, in the forest biomes where soil drying with warming was most severe (warmed plots have on  
142 average 84% and 87% of the moisture that was observed in control plots in the boreal and temperate  
143 forests, respectively), fluxes were still consistently higher from warmed plots despite drying (Fig. S9),  
144 due in part to relatively elevated ambient soil moisture conditions at these sites (Table S1).

145

146 Soil moisture often has a non-linear relationship with soil respiration. In order to determine if our  
147 multivariate linear model (Table S2) was a factor influencing our results, we re-ran our analysis using an  
148 additional function (Eq. 4, see below), which shows little difference in model fits (Table S6). Our study  
149 does not take into account differences in soil type between sites, as differences in soil type between  
150 warmed and control plots within a site should be minimal. In addition, soil moisture content largely  
151 reflects soil type across sites, as sandier soils hold less water than more clay-type soils. We see this in our  
152 data, as average soil moisture content in several biomes was negatively related to percent sand ( $r=0.98$ ,  
153  $0.62$ ,  $r=0.55$  in northern shrublands, grasslands and forests, respectively). Our analyses of soil moisture  
154 are based on soil water content (SWC), otherwise known as soil moisture concentrations. However, soil  
155 matric potentials are a much better indicator of water availability in soils, as this metric takes into account  
156 soil texture and organic matter content, which can affect relative water availability at the site level (1, 2).  
157 Because both factors undoubtedly change across sites, soil matric potentials are likely a more sensitive  
158 metric to evaluate how differences in moisture availability influence soil respiration rates.

159

160 *Role of Warming Duration and Seasonality on Soil Respiration Rates*

161 Multivariate analysis of respiration that included warming duration as a predictor, with an interaction with  
162 warming treatment (Model h in Table S3) revealed a significant interaction between duration and  
163 warming treatment in four biomes: desert, boreal forest, temperate forest, and northern shrubland. Except  
164 for northern shrublands, the other three biomes displayed significantly depressed soil respiration rates  
165 with increasing warming duration. Considering that it is in these three biomes where we observed  
166 moderate (temperate forest) to strong (boreal forest and desert) evidence of altered temperature response  
167 functions to soil warming, it appears that duration of experimental warming is an important factor in  
168 driving these results. We also evaluated how duration of warming changes the temperature response  
169 function of respiration in warmed versus control treatments by re-running our analysis shown in Table 1  
170 with data partitioned into the following groupings of years of warming duration (<2, 2-5, 5-10, and >10).  
171 This analysis continues to support prior conclusions, with no significant differences in the temperature  
172 response function in any biome regardless of warming duration, except the boreal forests and desert, and  
173 moderate ( $p=0.06$ ) differences from 2-5 years of warming duration in temperate forest.

174  
175 We investigated how season influenced soil respiration rates in a similar fashion to duration. First, we  
176 added season as a predictor to our multilinear regression model, with an interaction with warming  
177 treatment (Model i in Table S3). Here we found a significant interaction between season and warming  
178 treatment in the desert and boreal forest biomes only, indicating that in these two biomes respiration from  
179 warmed and control plots responds differently to temperature depending on the time of year. Next, we re-  
180 ran our analysis shown in Table 1 with data partitioned into season (non-growing, growing, shoulder) and  
181 found a similar result; for all biomes except the desert and boreal forests, no differences in temperature  
182 sensitivity were observed when analyzing any particular season in isolation. In the boreal forest,  
183 differences in temperature sensitivity were driven by growing season data, which make up the majority of  
184 the data (70%) for the boreal forest biome. On the other hand, the differences in sensitivity observed in  
185 the desert biome are driven by data from the non-growing season; this was the only season, when

186 examined in isolation, where significant differences in the temperature sensitivity of respiration from  
187 warmed versus control plots are observed in the desert biome.

188

### 189 *Model Choice*

190 We used several different multivariate models (Table S3) to answer specific questions during our  
191 analysis. To address our first objective (i.e., determine whether respiration response from warmed plots  
192 paralleled that from control plots), we used a temperature-treatment interaction model (Models c or d in  
193 Table S3, depending on whether the 2<sup>nd</sup>-order temperature term was significant when including the  
194 treatment interaction term). We also compared the fits (specifically AICs) of Models c or d with models  
195 excluding warming treatment as a predictor (Models a or b) to determine if warming treatments had an  
196 effect on the respiration response (Table S3). Lower AICs in Models a or b (Table S3) compared to  
197 Models c or d (Table S3) provides further evidence that experimental warming does not alter the shape of  
198 the curve to a large degree in those biomes. Parameter values for Models a and b (Table S3) also shown in  
199 Table S5. Next, to evaluate our second objective (i.e., investigate the role of soil moisture in influencing  
200 how respiration responds to temperature across treatments), we included soil moisture as a predictor, with  
201 an interaction term with temperature in our multivariate models (Models e and f in Table S3). Finally, to  
202 determine how warming duration and seasonality were influencing our results, we ran three additional  
203 models with these terms as predictors (Model g in Table S3), with an interaction term with warming  
204 treatment (Models h and i in Table S3).

205

206 We did not use the traditional exponential model (the  $Q_{10}$  model) or the Arrhenius model to fit our data as  
207 these models cannot adequately reflect our findings that the temperature sensitivity decreased when  
208 temperature is above  $\sim 25^{\circ}\text{C}$ . The inability of these models to represent varying temperature sensitivities  
209 across the temperature gradient has been discussed previously (3, 4). This study focused on understanding  
210 the temperature response of soil respiration with experimental warming, rather than modeling soil  
211 respiration. However, we also simulated our data using the following equation (5):



212

213 (4) 
$$R = e^{\alpha(T-T_o)} \left( \frac{T_m - T}{T_m - T_o} \right)^{\alpha(T_m - T_o)} \left( \frac{M}{k_m + M} \right)$$

214

215 With R = non-transformed soil respiration rate, T= soil temperature (°C), T<sub>o</sub> = optimum soil temperature  
216 (°C), T<sub>m</sub> = maximum soil temperature (°C), M = soil moisture concentration (cm<sup>3</sup> cm<sup>-3</sup>). T<sub>o</sub>, T<sub>m</sub>, k<sub>m</sub> and α  
217 were solved individually for each biome. Irrespective of having a similar or better overall performance  
218 (R<sup>2</sup> in Table S6), we selected the log-linear or log-quadratic equations to fit our data (Table 1, Eq. 1,  
219 Models c and d in Table S3) because it facilitated use of the binary categorical variable to evaluate  
220 differences in temperature response functions with warming treatment.

221

### 222 *Cross-Biome Differences*

223 Temperature response functions of soil respiration were not equal across biomes; not only were the  
224 temperature sensitivities different (γ<sub>1</sub> and γ<sub>2</sub>, Table 1), but the magnitudes of respiration (γ<sub>o</sub>, Table 1) also  
225 differed, with highest fluxes from boreal forests and lowest fluxes from deserts (Fig. S4). Multivariate  
226 regression output highlights these across-biome differences, as adding ‘biome’ as a predictor to the larger  
227 multivariate regression of all non-desert data increased the predictive power of the model by 28% (Model  
228 j in Table S3).

229

### 230 **Supporting References**

231

- 232 1. Reynolds LL, Johnson BR, Pfeifer-Meister L, Bridgham SD (2015) Soil respiration response to  
233 climate change in Pacific Northwest prairies is mediated by a regional Mediterranean climate  
234 gradient. *Glob Chang Biol* 21(1):487–500.  
235
- 236 2. Vicca S, et al. (2012) Urgent need for a common metric to make precipitation manipulation  
237 experiments comparable. *New Phytol* 195(3):518–22.  
238
- 239 3. Lloyd J, Taylor JA (1994) On the temperature dependence of soil respiration. *Funct Ecol*:315–

- 240 323.  
241
- 242 4. Davidson EA, Janssens IA (2006) Temperature sensitivity of soil carbon decomposition and  
243 feedbacks to climate change. *Nature* 440(7081):165–73.  
244
- 245 5. Rastetter EB, et al. (1991) A general biogeochemical model describing the responses of the C and  
246 N cycles in terrestrial ecosystems to changes in CO<sub>2</sub>, climate, and N deposition. *Tree Physiol* 9(1-  
247 2):101–126.  
248
- 249 6. Lellei-Kovács E, et al. (2008) Experimental warming does not enhance soil respiration in a  
250 semiarid temperate forest-steppe ecosystem. *Community Ecol* 9(1):29–37.  
251
- 252 7. de Dato GD, De Angelis P, Sirca C, Beier C (2009) Impact of drought and increasing temperatures  
253 on soil CO<sub>2</sub> emissions in a Mediterranean shrubland (gariga). *Plant Soil* 327(1-2):153–166.  
254
- 255 8. Saleska SR, Harte J, Torn MS (1999) The effect of experimental ecosystem warming on CO<sub>2</sub>  
256 fluxes in a montane meadow. *Glob Chang Biol* 5(2):125–141.  
257
- 258 9. Flanagan LB, Sharp EJ, Letts MG (2013) Response of plant biomass and soil respiration to  
259 experimental warming and precipitation manipulation in a Northern Great Plains grassland. *Agric  
260 For Meteorol* 173:40–52.  
261
- 262 10. Jarvi MP, Burton AJ (2013) Acclimation and soil moisture constrain sugar maple root respiration  
263 in experimentally warmed soil. *Tree Physiol* 33(9):949–959.  
264
- 265 11. Suseela V, Conant RT, Wallenstein MD, Dukes JS (2012) Effects of soil moisture on the  
266 temperature sensitivity of heterotrophic respiration vary seasonally in an old-field climate change  
267 experiment. *Glob Chang Biol* 18(1):336–348.  
268
- 269 12. Allison SD, Treseder KK (2008) Warming and drying suppress microbial activity and carbon  
270 cycling in boreal forest soils. *Glob Chang Biol* 14(12):2898–2909.  
271
- 272 13. Allison SD, McGuire KL, Treseder KK (2010) Resistance of microbial and soil properties to  
273 warming treatment seven years after boreal fire. *Soil Biol Biochem* 42(10):1872–1878.  
274
- 275 14. Poll C, Marhan S, Back F, Niklaus PA, Kandeler E (2013) Field-scale manipulation of soil  
276 temperature and precipitation change soil CO<sub>2</sub> flux in a temperate agricultural ecosystem. *Agric  
277 Ecosyst Environ* 165:88–97.  
278
- 279 15. Johnson LC, et al. (2000) Plant carbon - nutrient interactions control CO<sub>2</sub> exchange in Alaskan wet  
280 sedge tundra ecosystems. *Ecology* 81(2):453–469.  
281

- 282 16. Reinsch, S., Sowerby, A., Emmett, B.A. (2016) Fortnightly soil respiration data from Climoor  
283 fieldsite in Clocaenog Forest 1999 – 2015. DOI: 10.5285/[2]c0822023-0ec2-425f-8bf9-  
284 a546ce281ee0
- 285 17. Reinsch, S., Sowerby, A., Emmett, B.A. (2016) Daily plot level (micro meteorological) data at  
286 Climoor field site in Clocaenog Forest 1998-2015. DOI: [http://doi.org/10.5285/afb994e5-b33d-  
287 48b4-ad29-d374b1f9f3c8](http://doi.org/10.5285/afb994e5-b33d-48b4-ad29-d374b1f9f3c8)

288 **Fig. S1.**

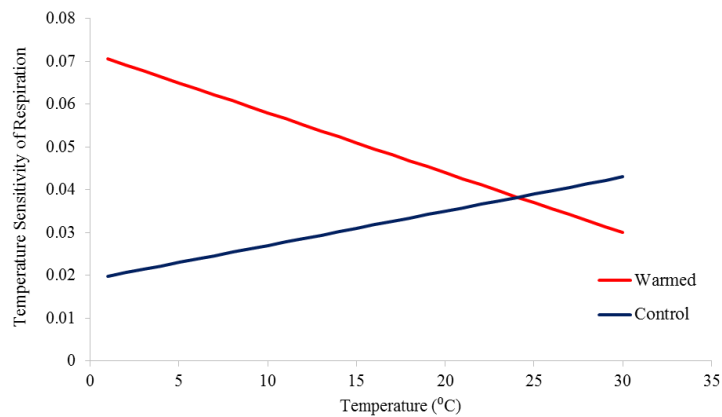

289

290

291

292 Temperature sensitivities for desert calculated as the linear functions describing the derivative of the log-

293 quadratic fit of ln respiration as a function of soil temperatures:  $\frac{\partial y}{\partial t} = -0.0014 T + 0.072$  (warmed) and  $\frac{\partial y}{\partial t}$

294  $= 0.0008 T + 0.019$  (control), where  $y$  refers to ln of respiration ( $\mu\text{mol C m}^{-2} \text{s}^{-1}$ ) and  $T$  refers to

295 temperature (°C).

296

297 **Fig. S2.**

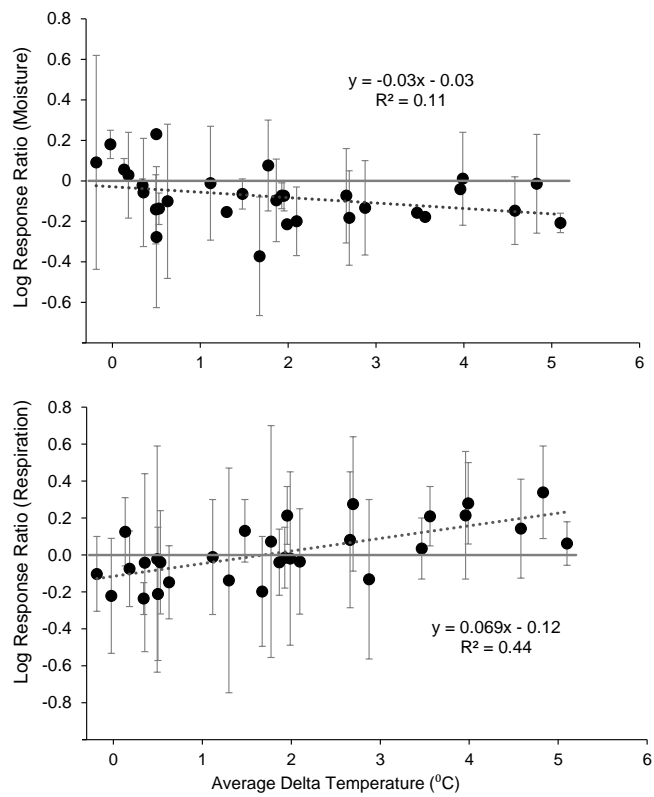

298  
299 Effect size (log response ratio) as a function of degree of experimental warming ( $\Delta T$  (°C)) for moisture  
300 (A) and respiration (B). Data from all biomes plotted here.

301  
302

303 **Fig. S3.**

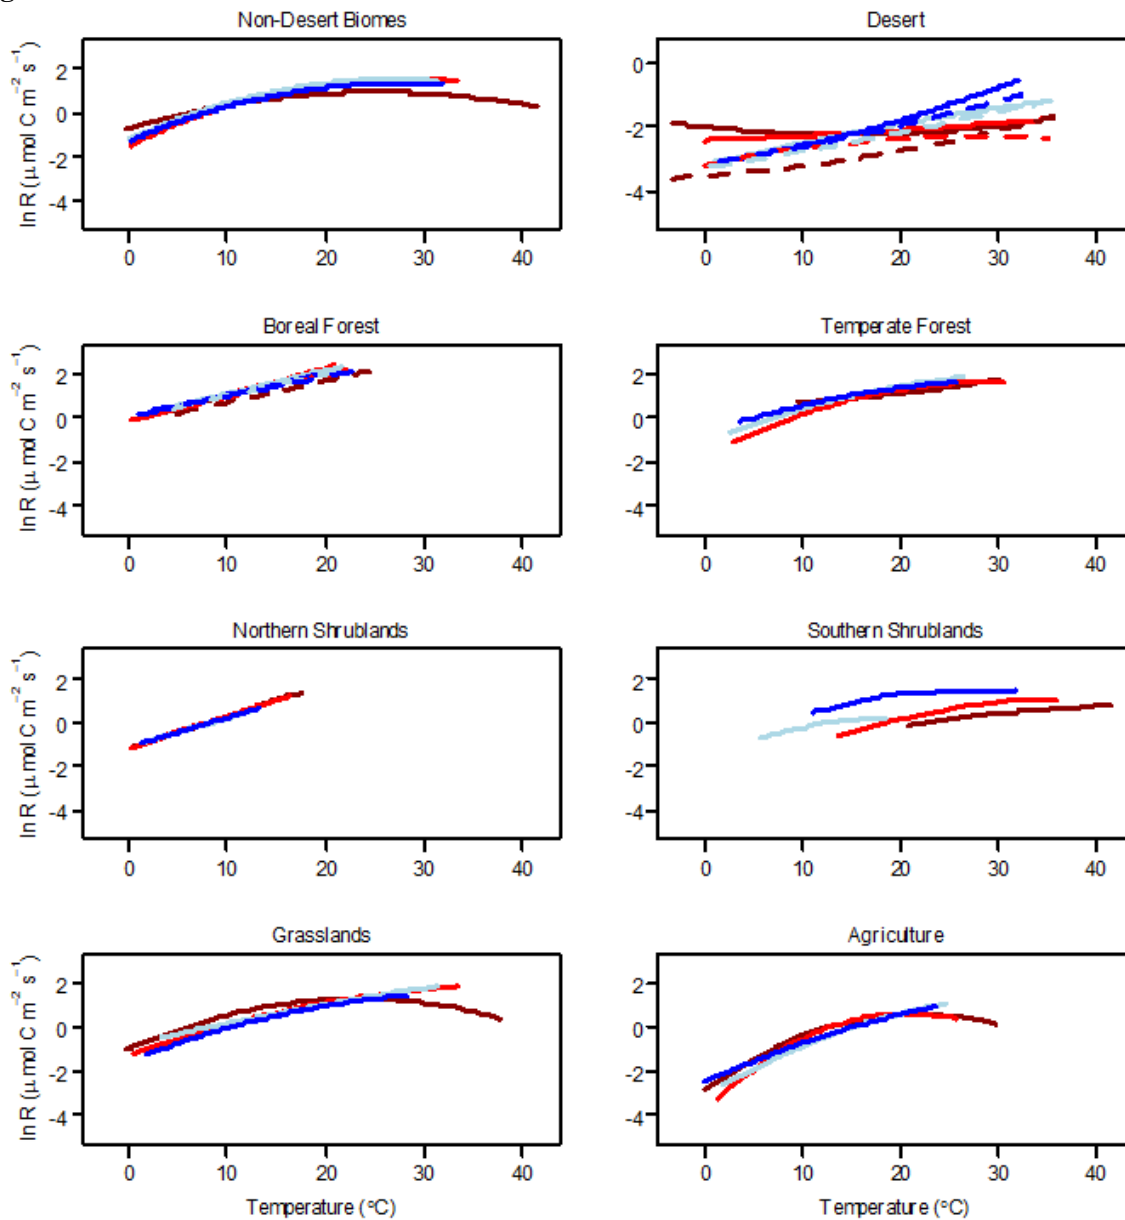

304

305

306 Best fit regression lines of natural log ( $\ln$ ) of respiration ( $\mu\text{mol C m}^{-2} \text{s}^{-1}$ ) as a function of soil temperature

307 ( $^{\circ}\text{C}$ ) across biome types, with data partitioned into moisture quantiles: dark red (1<sup>st</sup> (lowest) quartile), red

308 (2<sup>nd</sup> quartile), light blue (3<sup>rd</sup> quartile), dark blue (4<sup>th</sup> (highest) quartile). For model parameters, see Table

309 S3. Separate fits were calculated for control and warmed treatments where statistically different

310 temperature sensitivities were observed (boreal forest and desert), with dashed lines for warmed data and

311 solid lines for control data. Solid lines on all other plots represent both warmed and control data, as their

312 fits were not statistically different from one another. Note the scale of Y-axis are all equal, except for  
313 desert, which had lower respiration rates compared to all other biomes.

314 **Fig. S4.**  
315

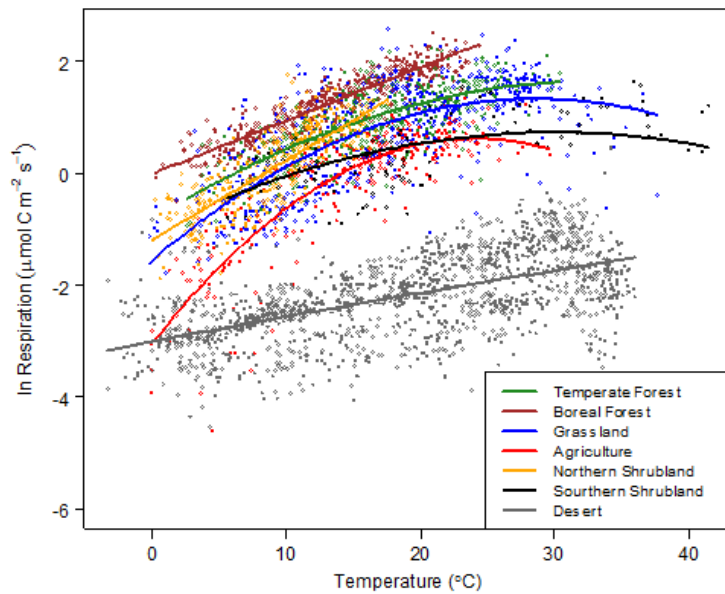

316  
317

318 Ln respiration ( $\mu\text{mol C m}^{-2} \text{s}^{-1}$ ) as a function of soil temperature ( $^{\circ}\text{C}$ ) for all data included in our study.

319 Each dot represents an individual data point, including data from both control and warmed treatments

320 ( $n=3817$ ). Lines are best-fit regression lines using the log-quadratic temperature response functions for all

321 biomes, except the boreal forest and northern shrublands, where log-linear functions were used (for

322 coefficients, see Table S5).

323



324 **Fig. S5.**

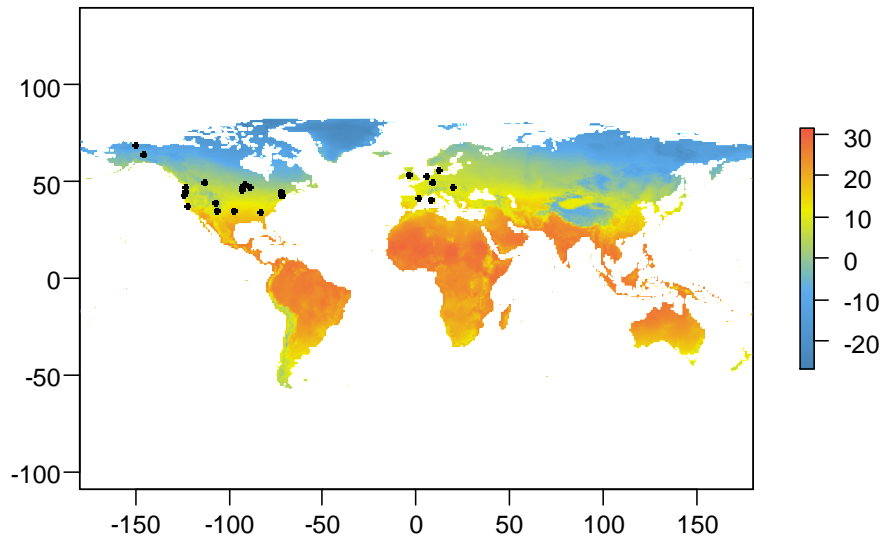

325  
326 Map of study sites. Color refers to mean annual temperature (°C). Map created using 'maps', 'mapdata',  
327 and 'raster' packages in R.

328 **Fig S6.**

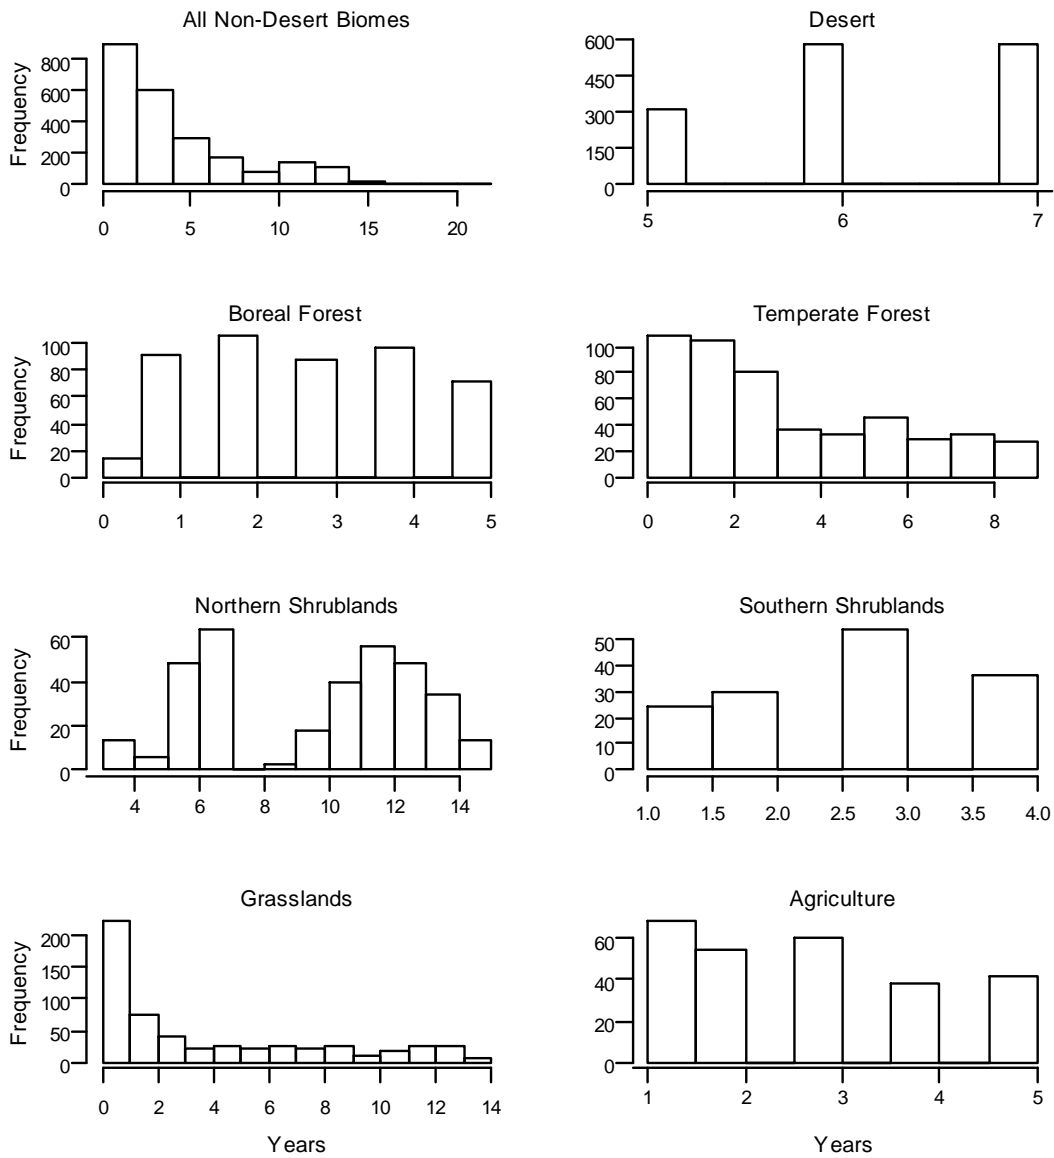

329

330 Histogram of duration of warming within each biome.

331  
332  
333 **Fig. S7.**

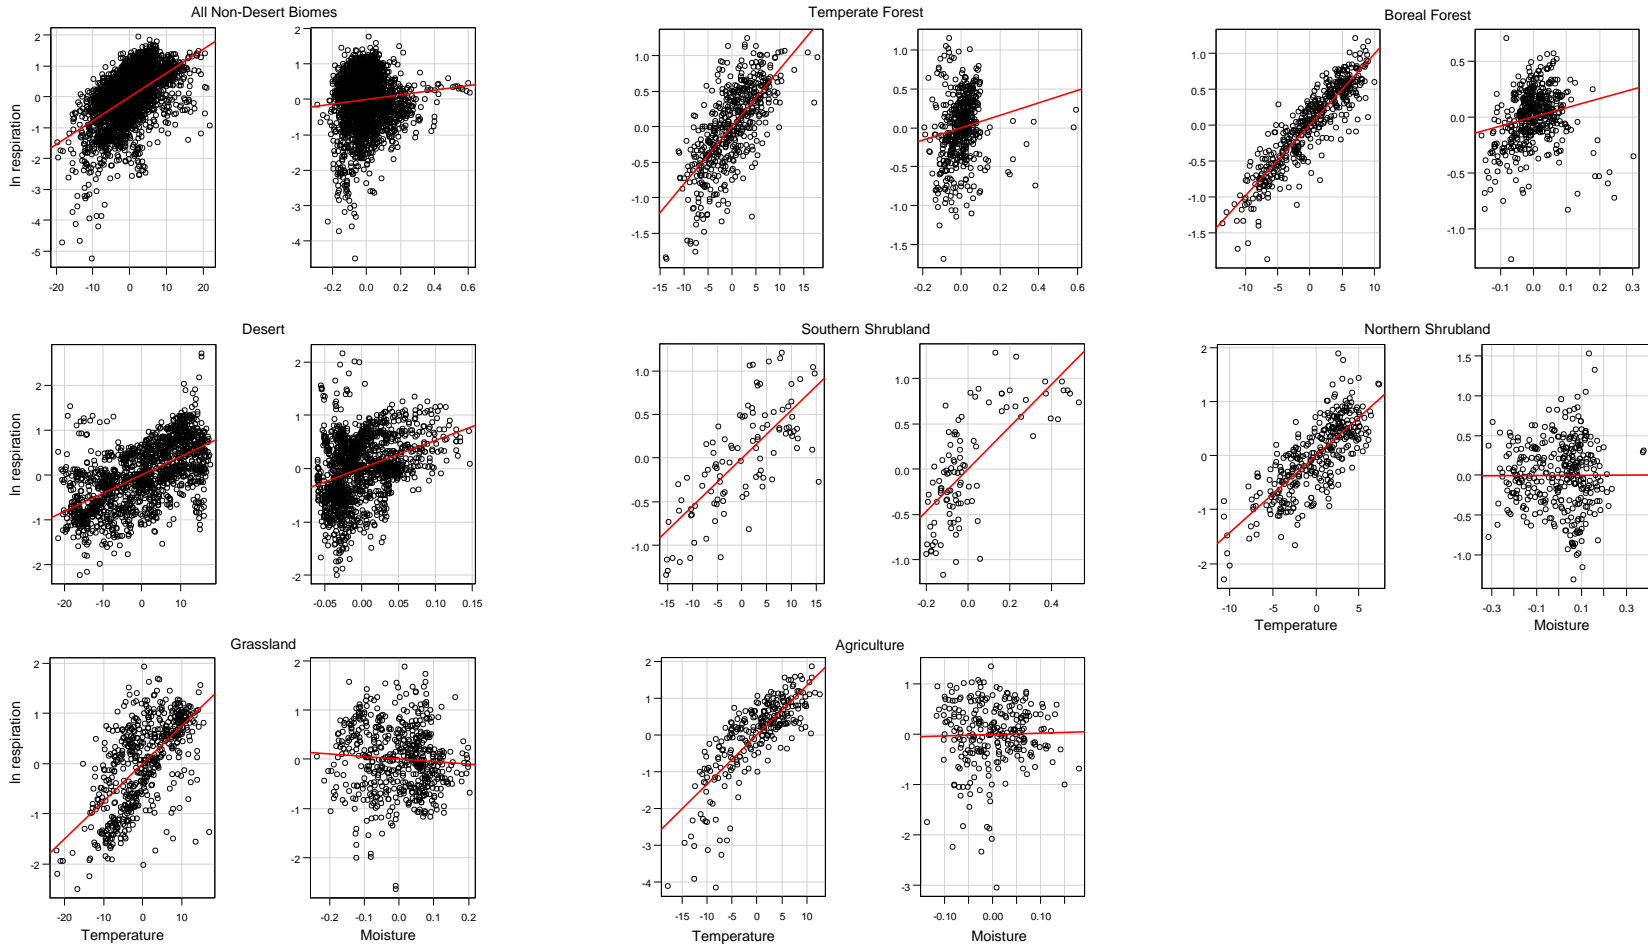

334  
335 Partial regression plots of soil respiration as a function of temperature and moisture across all biomes. Plots created using the 'car' package and  
336 AvPlots function in R.

337 **Fig. S8**

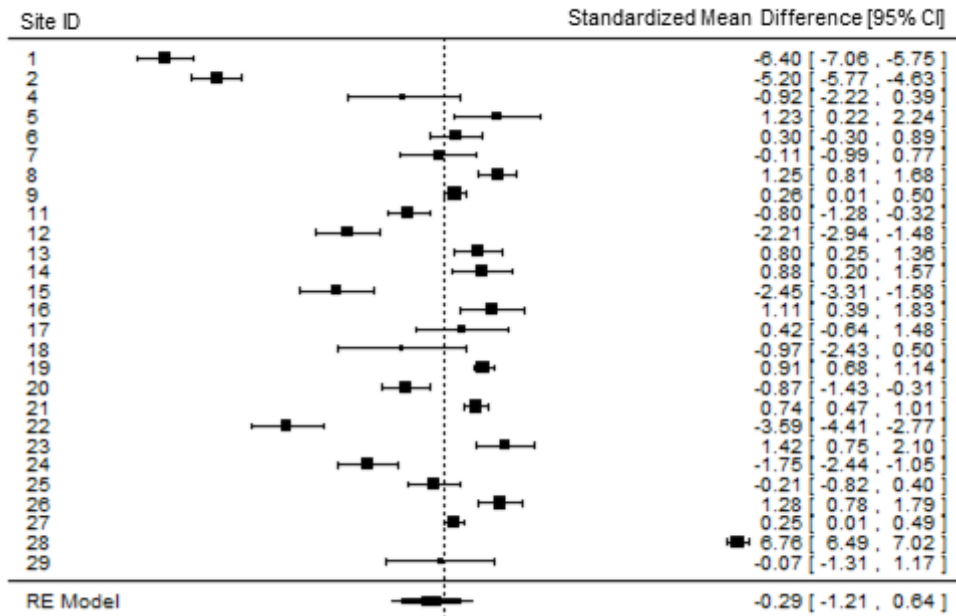

338  
 339 Forest plot of first-order temperature sensitivities ( $\gamma_1$  in Eq. 1) at each site. Size of filled squares indicates  
 340 number of observations. Error bars represent 95% confidence intervals. Error bars that do not cross zero  
 341 line indicate significant differences in temperature sensitivity between warmed and control plots. Values  
 342 on right of zero line indicate higher sensitivity in warmed plots, while values on left of zero line indicate  
 343 lower sensitivity of warmed plots.

344  
 345

346 **Fig. S9.**

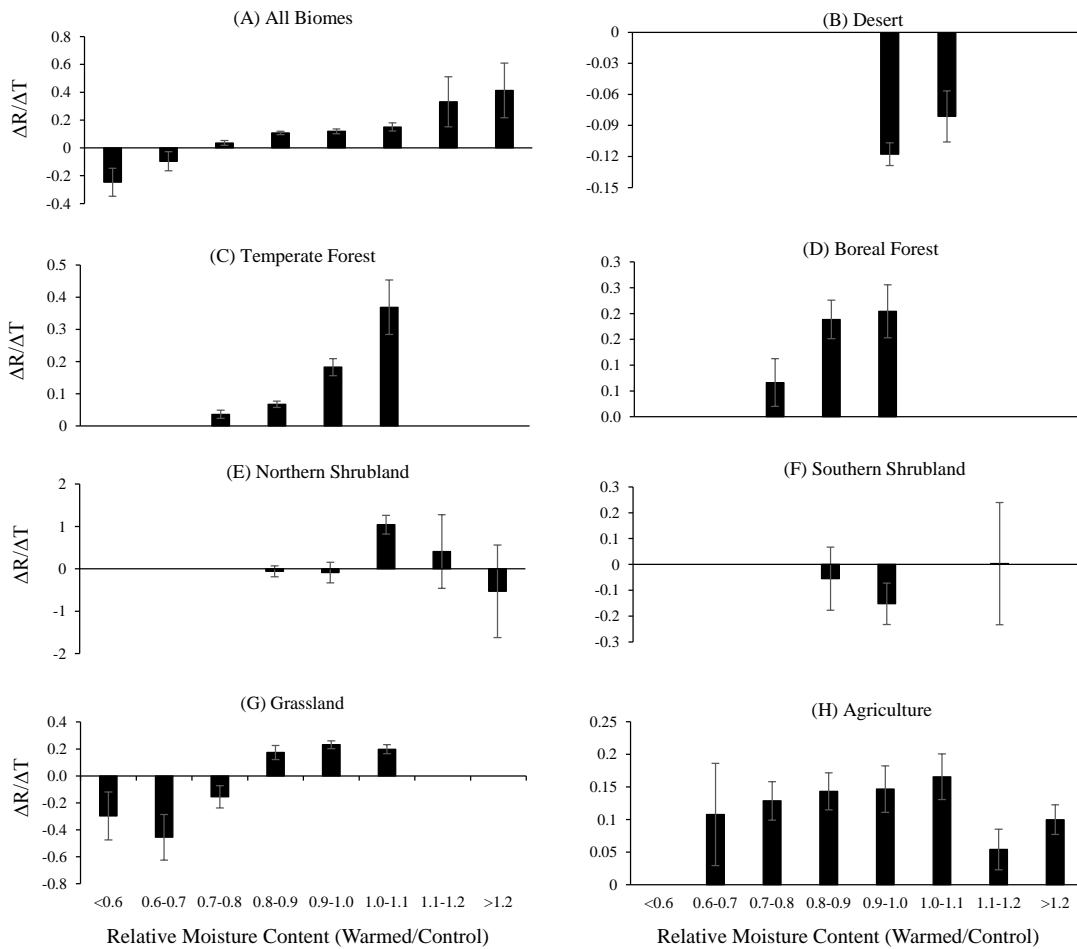

347

348

349 Difference in respiration ( $\mu\text{mol C m}^{-2} \text{s}^{-1}$ ) between warmed and control plots ( $\Delta R$ ) normalized by degree

350 of warming ( $\Delta T$  °C), binned by amount of soil desiccation with warming (soil moisture content in

351 warmed plots divided by soil moisture content in control plots) for each individual biome. X axis values

352 <1 indicate warmed plots have less moisture available than control plots. Y axis values <0 indicate that

353 respiration rates were lower from warmed plots, despite warmer soil temperatures. Respiration data not

354 log transformed. Note the scales of the Y-axes are different. For number of observations by biome see

355 Table S3.

356 **Supplementary Tables**

357

358 **Table S1.**

| Site ID | Name            | Ecosystem Type        | Warming Method | n   | Average Delta Temperature (°C) | Control                                                     |      | Warmed Treatment (multiple levels)                          |      | Average Ambient Moisture (cm <sup>3</sup> cm <sup>-3</sup> ) | Average Delta Moisture (cm <sup>3</sup> cm <sup>-3</sup> ) | MAP (mm) | MAT (°C) | Elevation (m) | Duration Range** | %Sand | %Silt | %Clay |
|---------|-----------------|-----------------------|----------------|-----|--------------------------------|-------------------------------------------------------------|------|-------------------------------------------------------------|------|--------------------------------------------------------------|------------------------------------------------------------|----------|----------|---------------|------------------|-------|-------|-------|
|         |                 |                       |                |     |                                | Average Respiration (μmol m <sup>-2</sup> s <sup>-1</sup> ) | SE   | Average Respiration (μmol m <sup>-2</sup> s <sup>-1</sup> ) | SE   |                                                              |                                                            |          |          |               |                  |       |       |       |
| 1       | B4W_CFC         | Boreal Forest         | Infrared       | 75  | 1.87                           | 4.38                                                        | 0.29 | 4.21                                                        | 0.25 | 0.213                                                        | 0.020                                                      | 752      | 4.23     | 413           | 5                | 60.9  | 30.5  | 8.6   |
| 1       | B4W_CFC         | Boreal Forest         | Infrared       | 75  | 3.47                           |                                                             |      | 4.53                                                        | 0.24 |                                                              | -0.031                                                     |          |          |               |                  |       |       |       |
| 2       | B4W_HWRC        | Boreal Forest         | Infrared       | 71  | 1.93                           | 4.08                                                        | 0.26 | 4.02                                                        | 0.22 | 0.278                                                        | 0.020                                                      | 665      | 3.57     | 383           | 5                | 62.3  | 23.5  | 14.2  |
| 2       | B4W_HWRC        | Boreal Forest         | Infrared       | 71  | 3.56                           |                                                             |      | 5.03                                                        | 0.25 |                                                              | -0.045                                                     |          |          |               |                  |       |       |       |
| 4       | Tower_Burn      | Boreal Forest         | Passive        | 5   | 0.49                           | 1.68                                                        | 0.40 | 1.65                                                        | 0.34 | 0.475                                                        | 0.062                                                      | 303      | -2       | 457           | 2                | 31.6  | 56.8  | 11.8  |
| 5       | Tower_Control   | Boreal Forest         | Passive        | 9   | 0.50                           | 2.40                                                        | 0.19 | 1.94                                                        | 0.33 | 0.202                                                        | 0.049                                                      | 303      | -2       | 499           | 2                | 34.1  | 53.5  | 12.4  |
| 6       | Ford^           | Temperate Forest      | Infrared       | 22  | 4.58                           | 2.89                                                        | 0.28 | 3.33                                                        | 0.31 | 0.240                                                        | 0.033                                                      | 879      | 4.9      | 402           | 5                | 62.1  | 29.0  | 9.0   |
| 7       | HBEF            | Temperate Forest      | Electric Cable | 10  | 4.83                           | 5.18                                                        | 0.52 | 7.28                                                        | 0.61 | 0.144                                                        | 0.002                                                      | 1400     | 5.2      | 252           | 1                | 60.0  | 30.0  | 10.0  |
| 8       | HF_Frey         | Temperate Forest      | Electric Cable | 48  | 3.99                           | 1.91                                                        | 0.16 | 2.53                                                        | 0.19 | 0.243                                                        | -0.003                                                     | 1100     | 7        | 1026.5        | 8                | 62.0  | 22.0  | 15.0  |
| 9       | HF_Melillo      | Temperate Forest      | Electric Cable | 130 | 5.10                           | 3.03                                                        | 0.14 | 3.22                                                        | 0.13 | 0.276                                                        | 0.052                                                      | 1080     | 7        | 1026.5        | 9                | 62.0  | 22.0  | 15.0  |
| 11      | Whitehall       | Temperate Forest      | Electric Cable | 29  | 2.10                           | 3.10                                                        | 0.34 | 3.00                                                        | 0.29 | 0.171                                                        | 0.031                                                      | 99       | 17.6     | 207           | 4                | 63.9  | 18.0  | 18.1  |
| 11      | Whitehall       | Temperate Forest      | Electric Cable | 19  | 3.96                           |                                                             |      | 4.24                                                        | 0.50 |                                                              | -0.007                                                     |          |          |               |                  |       |       |       |
| 12      | BACE^           | Temperate Grassland   | Infrared       | 14  | 0.35                           | 3.22                                                        | 0.59 | 3.09                                                        | 0.51 | 0.225                                                        | 0.013                                                      | 1194     | 9.5      | 17            | 2                | 45.0  | 46.0  | 9.0   |
| 12      | BACE^           | Temperate Grassland   | Infrared       | 14  | 1.99                           |                                                             |      | 3.16                                                        | 0.49 |                                                              | -0.044                                                     |          |          |               |                  |       |       |       |
| 12      | BACE^           | Temperate Grassland   | Infrared       | 14  | 2.93                           |                                                             |      | 3.26                                                        | 0.45 |                                                              | -0.070                                                     |          |          |               |                  |       |       |       |
| 13      | BioCON          | Temperate Grassland   | Infrared       | 27  | 1.67                           | 5.30                                                        | 0.59 | 4.35                                                        | 0.46 | 0.079                                                        | 0.025                                                      | 660      | 6.7      | 282           | 2                | 94.4  | 0.0   | 2.5   |
| 14      | COR             | Temperate Grassland   | Infrared       | 18  | 2.66                           | 2.75                                                        | 0.38 | 2.99                                                        | 0.37 | 0.257                                                        | 0.018                                                      | 1134     | 11.4     | 164           | 2                | 36.5  | 49.0  | 14.5  |
| 15      | SOR             | Temperate Grassland   | Infrared       | 18  | 2.88                           | 2.92                                                        | 0.47 | 2.56                                                        | 0.38 | 0.234                                                        | 0.029                                                      | 1434     | 12.3     | 395           | 2                | 31.5  | 37.5  | 31.0  |
| 16      | WA              | Temperate Grassland   | Infrared       | 17  | 2.70                           | 2.18                                                        | 0.29 | 2.87                                                        | 0.37 | 0.162                                                        | 0.027                                                      | 1196     | 10.5     | 134           | 2                | 75.0  | 21.5  | 3.5   |
| 17      | FluxnetCanada * | Temperate Grassland   | Passive        | 7   | 0.50                           | 3.27                                                        | 0.70 | 8.44                                                        | 0.98 | 0.220                                                        | -0.057                                                     | 386      | 5.4      | 960           | 1                | 28.8  | 40.0  | 31.2  |
| 18      | JasperRidge     | Temperate Grassland   | Infrared       | 4   | 1.77                           | 4.87                                                        | 1.53 | 5.23                                                        | 0.35 | 0.076                                                        | -0.006                                                     | 531      | 15.3     | 120           | 1                | 37.0  | 48.0  | 15.0  |
| 19      | Kessler         | Temperate Grassland   | Infrared       | 164 | 1.48                           | 2.20                                                        | 0.13 | 2.51                                                        | 0.15 | 0.255                                                        | 0.016                                                      | 914      | 16.3     | 335           | 13               | 36.0  | 55.0  | 10.0  |
| 20      | MountainMeadow^ | Meadow                | Infrared       | 27  | 1.12                           | 2.49                                                        | 0.29 | 2.46                                                        | 0.27 | 0.109                                                        | 0.001                                                      | 750      |          | 2920          | 20               | na    | na    | na    |
| 21      | Clocaenog       | Northern Shrubland    | Passive        | 114 | 0.13                           | 1.23                                                        | 0.09 | 1.40                                                        | 0.09 | 0.421                                                        | -0.024                                                     | 1289     | 8.2      | 490           | 13               | 40.2  | 50.0  | 9.8   |
| 22      | Garraf          | Southern Shrubland    | Passive        | 30  | 0.18                           | 1.11                                                        | 0.09 | 1.03                                                        | 0.07 | 0.185                                                        | -0.005                                                     | 570      | 15.6     | 215           | 2                | 42.9  | 38.7  | 18.4  |
| 23      | Hungary*        | Southern Shrubland    | Passive        | 21  | 0.63                           | 0.42                                                        | 0.03 | 0.37                                                        | 0.03 | 0.051                                                        | 0.005                                                      | 505      | 10.4     |               | 3                |       |       |       |
| 24      | Oldbroek        | Northern Shrubland    | Passive        | 22  | -0.02                          | 1.39                                                        | 0.16 | 1.11                                                        | 0.12 | 0.215                                                        | -0.043                                                     | 1072     | 10.1     | 25            | 3                | 93.5  | 6.0   | 0.5   |
| 25      | PCCC^           | Southern Shrubland    | Passive        | 21  | -0.18                          | 3.08                                                        | 0.22 | 2.78                                                        | 0.20 | 0.328                                                        | -0.031                                                     | 640      | 16.8     | 40            | 3                | 75.6  | 11.2  | 13.4  |
| 26      | Brandbjerg      | Northern Shrubland    | Passive        | 36  | 0.53                           | 1.73                                                        | 0.17 | 1.66                                                        | 0.17 | 0.178                                                        | 0.023                                                      | 757      | 8.7      | 9             | 2                | 91.0  | 7.0   | 2.0   |
| 27      | HoCC            | Temperate Agriculture | Electric Cable | 131 | 1.95                           | 1.07                                                        | 0.06 | 1.32                                                        | 0.07 | 0.210                                                        | 0.015                                                      | 679      | 8.7      | 395           | 5                | 9.0   | 69.0  | 22.0  |
| 28      | Sevilleta       | Desert                | Passive        | 737 | 0.34                           | 0.16                                                        | 0.00 | 0.13                                                        | 0.00 | 0.112                                                        | 0.003                                                      | 250      | 13.2     | 1525          | 3                | 68.0  | 22.0  | 10.0  |
| 29      | Toolik          | Wet Sedge Tundra      | Passive        | 5   | 1.30                           | 0.76                                                        | 0.20 | 0.66                                                        | 0.11 | 0.700                                                        | 0.100                                                      | 331      | -8.5     | 717           | 1                | na    | na    | na    |

\*data from published literature only

^ data from both published and unpublished data

\*\*Years of observations since warming started

359

360 Characteristics of each site included in study, including both published and unpublished sources (6–17).

361

362 **Table S2**

| <b>Parameters for models: <math>\ln(R) \sim \alpha_0 + \alpha_1 T + \alpha_2 T^2 + \alpha_3 M</math></b> |                                            |                                            |                                            |                                            |          |                      |
|----------------------------------------------------------------------------------------------------------|--------------------------------------------|--------------------------------------------|--------------------------------------------|--------------------------------------------|----------|----------------------|
| <b>Model</b>                                                                                             | <b><math>\alpha_0 \pm \text{SE}</math></b> | <b><math>\alpha_1 \pm \text{SE}</math></b> | <b><math>\alpha_2 \pm \text{SE}</math></b> | <b><math>\alpha_3 \pm \text{SE}</math></b> | <b>n</b> | <b>R<sup>2</sup></b> |
| <i>All Biomes Except Desert</i>                                                                          | -1.547 ± 0.078                             | 0.210 ± 0.008                              | -0.004 ± 0.0022                            | 0.692 ± 0.142                              | 2343     | 0.39                 |
| <i>Desert</i>                                                                                            |                                            |                                            |                                            |                                            |          |                      |
| Control Treatment                                                                                        | -2.875 ± 0.069                             | 0.009 ± 0.007                              | 0.001 ± 0.0002                             | 3.320 ± 0.474                              | 737      | 0.38                 |
| Warming Treatment                                                                                        | -4.065 ± 0.078                             | 0.005 ± 0.008                              | <0.0001 ± 0.0002                           | 7.228 ± 0.549                              | 737      | 0.53                 |
| <i>Boreal Forest</i>                                                                                     |                                            |                                            |                                            |                                            |          |                      |
| Control Treatment                                                                                        | 0.020 ± 0.085                              | 0.108 ± 0.003                              | na                                         | -0.286 ± 0.256                             | 160      | 0.88                 |
| Warming Treatment                                                                                        | -0.368 ± 0.074                             | 0.098 ± 0.003                              | na                                         | 1.301 ± 0.231                              | 306      | 0.82                 |
| <i>Temperate Forest</i>                                                                                  | -1.082 ± 0.157                             | 0.152 ± 0.017                              | -0.002 ± 0.0005                            | 0.817 ± 0.234                              | 497      | 0.52                 |
| <i>Northern Shrubland</i>                                                                                | -1.180 ± 0.106                             | 0.142 ± 0.006                              | na                                         | 0.020 ± 0.187                              | 344      | 0.63                 |
| <i>Southern Shrubland</i>                                                                                | -1.825 ± 0.244                             | 0.109 ± 0.022                              | -0.001 ± 0.0005                            | 2.236 ± 0.234                              | 102      | 0.6                  |
| <i>Grassland</i>                                                                                         | -1.338 ± 0.145                             | 0.201 ± 0.015                              | -0.004 ± 0.0004                            | -0.708 ± 0.299                             | 566      | 0.52                 |
| <i>Temperate Agriculture</i>                                                                             | -3.076 ± 0.206                             | 0.304 ± 0.022                              | -0.006 ± 0.0078                            | 0.202 ± 0.597                              | 262      | 0.72                 |

363

364

365 Parameters for multivariate regression model of soil respiration (natural log, in  $\mu\text{mol C m}^{-2} \text{s}^{-1}$ ) (R) as a366 function of soil temperature ( $^{\circ}\text{C}$ ) (T) and soil moisture ( $\text{cm}^3 \text{cm}^{-3}$ ) (M). In biomes with significantly

367 different temperature sensitivities between warming and control treatments (boreal and desert biomes),

368 control and warmed data were run in model separately. n= number of observations, R<sup>2</sup> = coefficient of369 determination. Parameter units:  $\alpha_0 = \ln \mu\text{mol C m}^{-2} \text{s}^{-1}$ ;  $\alpha_1 = ^{\circ}\text{C}^{-1}$ ;  $\alpha_2 = ^{\circ}\text{C}^{-2}$ ,  $\alpha_3 = \text{cm}^{-3} \text{cm}^3$ .

370

371 **Table S3.**

| Model ID                                 | Model Terms                                  | Significant Interaction? | df   | R <sup>2</sup> | Δ AICc |
|------------------------------------------|----------------------------------------------|--------------------------|------|----------------|--------|
| <i>All Biomes Except Desert (n=2343)</i> |                                              |                          |      |                |        |
| a                                        | R~T                                          | NA                       | 2341 | 0.30           | 1745   |
| b                                        | R~T + T <sup>2</sup>                         | NA                       | 2340 | 0.39           | 1436   |
| c                                        | R~T*W                                        | No                       | 2339 | 0.30           | 1744   |
| d                                        | R~T*W + T <sup>2</sup> *W                    | No                       | 2327 | 0.39           | 1437   |
| e                                        | R~T + T <sup>2</sup> + Moisture              | NA                       | 2339 | 0.39           | 1415   |
| f                                        | R~T*Moisture + T <sup>2</sup> *Moisture      | No                       | 2337 | 0.41           | 1359   |
| g                                        | R~T + T <sup>2</sup> + Moisture + Duration   | NA                       | 2338 | 0.40           | 1393   |
| h                                        | R~T + T <sup>2</sup> + Duration*W            | No                       | 2337 | 0.39           | 1429   |
| i                                        | R~T + T <sup>2</sup> + Season*W              | No                       | 2335 | 0.44           | 1222   |
| j                                        | R~T*Biome + T <sup>2</sup> *Biome + Moisture | Yes                      | 2321 | 0.67           | 0      |
| <i>Desert (n=1474)</i>                   |                                              |                          |      |                |        |
| a                                        | R~T                                          | NA                       | 1472 | 0.34           | 318    |
| b                                        | R~T + T <sup>2</sup>                         | NA                       | 1471 | 0.34           | 320    |
| c                                        | R~T*W                                        | Yes                      | 1470 | 0.41           | 153    |
| d                                        | R~T*W + T <sup>2</sup> *W                    | Yes                      | 1468 | 0.42           | 144    |
| e                                        | R~T + T <sup>2</sup> + Moisture              | NA                       | 1470 | 0.42           | 140    |
| f                                        | R~T*Moisture + T <sup>2</sup> *Moisture      | Yes                      | 1468 | 0.47           | 0      |
| g                                        | R~T + T <sup>2</sup> + Moisture + Duration   | NA                       | 1469 | 0.42           | 139    |
| h                                        | R~T + T <sup>2</sup> + Duration*W            | Yes                      | 1468 | 0.42           | 143    |
| i                                        | R~T + T <sup>2</sup> + Season*W              | Yes                      | 1466 | 0.44           | 76     |
| <i>Boreal Forest (n=466)</i>             |                                              |                          |      |                |        |
| a                                        | R~T                                          | NA                       | 464  | 0.82           | 52     |
| b                                        | R~T + T <sup>2</sup>                         | NA                       | 463  | 0.82           | 43     |
| c                                        | R~T*W                                        | Yes                      | 463  | 0.84           | 2      |
| d                                        | R~T*W + T <sup>2</sup> *W                    | No                       | 460  | 0.84           | 0      |
| e                                        | R~T + Moisture                               | NA                       | 463  | 0.82           | 34     |
| f                                        | R~T*Moisture                                 | Yes                      | 462  | 0.83           | 21     |
| g                                        | R~T + Moisture + Duration                    | NA                       | 462  | 0.83           | 29     |
| h                                        | R~T + Duration*W                             | Yes                      | 461  | 0.83           | 8      |
| i                                        | R~T + T <sup>2</sup> + Season*W              | Yes                      | 459  | 0.83           | 12     |
| <i>Temperate Forest (n=497)</i>          |                                              |                          |      |                |        |
| a                                        | R~T                                          | NA                       | 495  | 0.49           | 92     |
| b                                        | R~T + T <sup>2</sup>                         | NA                       | 494  | 0.51           | 77     |
| c                                        | R~T*W                                        | No                       | 493  | 0.52           | 62     |
| d                                        | R~T*W + T <sup>2</sup> *W                    | No                       | 491  | 0.54           | 46     |
| e                                        | R~T + T <sup>2</sup> + Moisture              | NA                       | 493  | 0.52           | 67     |
| f                                        | R~T*Moisture + T <sup>2</sup> *Moisture      | No                       | 491  | 0.52           | 69     |
| g                                        | R~T + T <sup>2</sup> + Moisture + Duration   | NA                       | 492  | 0.52           | 69     |
| h                                        | R~T + T <sup>2</sup> + Duration*W            | Yes                      | 491  | 0.54           | 45     |
| i                                        | R~T + T <sup>2</sup> + Season*W              | No                       | 489  | 0.58           | 0      |
| <i>Northern Shrubland (n=344)</i>        |                                              |                          |      |                |        |
| a                                        | R~T                                          | NA                       | 342  | 0.63           | 60     |
| b                                        | R~T + T <sup>2</sup>                         | NA                       | 341  | 0.63           | 62     |
| c                                        | R~T*W                                        | No                       | 340  | 0.63           | 64     |
| d                                        | R~T*W + T <sup>2</sup> *W                    | No                       | 338  | 0.63           | 65     |
| e                                        | R~T + Moisture                               | NA                       | 341  | 0.63           | 62     |
| f                                        | R~T*Moisture                                 | No                       | 340  | 0.63           | 63     |
| g                                        | R~T + Moisture + Duration                    | NA                       | 340  | 0.69           | 0      |
| h                                        | R~T + Duration*W                             | Yes                      | 339  | 0.69           | 7      |
| i                                        | R~T + Season*W                               | No                       | 337  | 0.63           | 66     |

372

373



374 **Table S3 Continued.**

| Model ID                                         | Model Terms                                       | Significant Interaction? | df  | R <sup>2</sup> | ΔAICc |
|--------------------------------------------------|---------------------------------------------------|--------------------------|-----|----------------|-------|
| <i>Southern Shrubland - no Hungary (n=102)</i>   |                                                   |                          |     |                |       |
| a                                                | R~T                                               | NA                       | 100 | 0.15           | 92    |
| b                                                | R~T + T <sup>2</sup>                              | NA                       | 99  | 0.23           | 85    |
| c                                                | R~T*W                                             | No                       | 98  | 0.16           | 96    |
| d                                                | R~T*W + T <sup>2</sup> *W                         | No                       | 96  | 0.25           | 88    |
| e                                                | R~T + T <sup>2</sup> + <b>Moisture</b>            | NA                       | 98  | 0.60           | 19    |
| f                                                | R~T*Moisture + T <sup>2</sup> *Moisture           | No                       | 96  | 0.60           | 23    |
| g                                                | R~T + T <sup>2</sup> + <b>Moisture + Duration</b> | NA                       | 97  | 0.68           | 0     |
| h                                                | R~T + T <sup>2</sup> + <b>Duration*W</b>          | No                       | 96  | 0.47           | 46    |
| i                                                | R~T + T <sup>2</sup> + <b>Season*W</b>            | No                       | 94  | 0.18           | 93    |
| <i>Southern Shrubland - with Hungary (n=144)</i> |                                                   |                          |     |                |       |
| a                                                | R~T                                               | NA                       | 142 | 0.06           | 124   |
| b                                                | R~T + T <sup>2</sup>                              | NA                       | 141 | 0.09           | 120   |
| c                                                | R~T*W                                             | No                       | 140 | 0.06           | 127   |
| d                                                | R~T*W + T <sup>2</sup> *W                         | No                       | 138 | 0.11           | 123   |
| e                                                | R~T + T <sup>2</sup> + <b>Moisture</b>            | NA                       | 140 | 0.6            | 4     |
| f                                                | R~T*Moisture + T <sup>2</sup> *Moisture           | No                       | 128 | 0.62           | 0     |
| g                                                | R~T + T <sup>2</sup> + <b>Moisture + Duration</b> | NA                       | 139 | 0.62           | 1     |
| <i>Grassland (n=566)</i>                         |                                                   |                          |     |                |       |
| a                                                | R~T                                               | NA                       | 564 | 0.45           | 151   |
| b                                                | R~T + T <sup>2</sup>                              | NA                       | 563 | 0.52           | 82    |
| c                                                | R~T*W                                             | No                       | 562 | 0.45           | 154   |
| d                                                | R~T*W + T <sup>2</sup> *W                         | No                       | 560 | 0.51           | 87    |
| e                                                | R~T + T <sup>2</sup> + <b>Moisture</b>            | NA                       | 562 | 0.52           | 78    |
| f                                                | R~T*Moisture + T <sup>2</sup> *Moisture           | Yes                      | 560 | 0.54           | 51    |
| g                                                | R~T + T <sup>2</sup> + <b>Moisture + Duration</b> | NA                       | 561 | 0.56           | 24    |
| h                                                | R~T + T <sup>2</sup> + <b>Duration*W</b>          | No                       | 560 | 0.56           | 24    |
| i                                                | R~T + T <sup>2</sup> + <b>Season*W</b>            | No                       | 558 | 0.58           | 0     |
| <i>Temperate Agriculture (n=262)</i>             |                                                   |                          |     |                |       |
| a                                                | R~T                                               | NA                       | 260 | 0.66           | 73    |
| b                                                | R~T + T <sup>2</sup>                              | NA                       | 259 | 0.72           | 17    |
| c                                                | R~T*W                                             | No                       | 258 | 0.66           | 75    |
| d                                                | R~T*W + T <sup>2</sup> *W                         | No                       | 256 | 0.73           | 22    |
| e                                                | R~T + T <sup>2</sup> + <b>Moisture</b>            | NA                       | 258 | 0.72           | 19    |
| f                                                | R~T*Moisture + T <sup>2</sup> *Moisture           | Yes                      | 256 | 0.74           | 9     |
| g                                                | R~T + T <sup>2</sup> + <b>Moisture + Duration</b> | NA                       | 257 | 0.73           | 16    |
| h                                                | R~T + T <sup>2</sup> + <b>Duration*W</b>          | No                       | 256 | 0.73           | 18    |
| i                                                | R~T + T <sup>2</sup> + <b>Season*W</b>            | No                       | 254 | 0.74           | 0     |

375  
 376 Summary of various models and their fits of soil respiration as a function of multiple variables. R = soil  
 377 respiration (natural log, in  $\mu\text{mol C m}^{-2} \text{ s}^{-1}$ ), T = soil temperature ( $^{\circ}\text{C}$ ), M= soil moisture content ( $\text{cm}^3 \text{ cm}^{-3}$ ),  
 378 <sup>3</sup>), W = treatment (control or warmed), df=degrees of freedom, R<sup>2</sup>= coefficient of determination, ΔAICc =  
 379 delta Akaike information criterion, with zero as best and all other model values presented relative to zero.  
 380 Bold indicates significant predictor of respiration. Asterisk indicates interaction term in model.

381 **Table S4.**

| Parameters for models: $\text{LnR} \sim \alpha_0 + \alpha_1 T + \alpha_2 T^2$ |            |            |            |     |       |
|-------------------------------------------------------------------------------|------------|------------|------------|-----|-------|
| Moisture Quartile ( $\text{cm}^3 \text{cm}^{-3}$ )                            | $\alpha_0$ | $\alpha_1$ | $\alpha_2$ | n   | $R^2$ |
| <i>Non-desert biomes</i>                                                      |            |            |            |     |       |
| First quartile (<0.163)                                                       | -0.897     | 0.147      | -0.0029    | 585 | 0.13  |
| Second quartile (0.163-0.228)                                                 | -1.410     | 0.211      | -0.0038    | 580 | 0.49  |
| Third quartile (0.228-0.29)                                                   | -1.224     | 0.201      | -0.0036    | 559 | 0.42  |
| Fourth quartile (>0.29)                                                       | -1.276     | 0.188      | -0.0033    | 605 | 0.46  |
| <i>Desert - Control</i>                                                       |            |            |            |     |       |
| First quartile (<0.082)                                                       | -2.010     | -0.032     | 0.0011     | 184 | 0.01  |
| Second quartile (0.082-0.102)                                                 | -2.418     | 0.016      | 0.0002     | 185 | 0.23  |
| Third quartile (0.102-0.139)                                                  | -3.200     | 0.074      | -0.0005    | 183 | 0.59  |
| Fourth quartile (>0.139)                                                      | -3.170     | 0.046      | 0.0012     | 185 | 0.88  |
| <i>Desert - Warmed</i>                                                        |            |            |            |     |       |
| First quartile (<0.082)                                                       | -3.544     | 0.023      | 0.0008     | 184 | 0.60  |
| Second quartile (0.082-0.102)                                                 | -3.220     | 0.066      | -0.0012    | 183 | 0.17  |
| Third quartile (0.102-0.14)                                                   | -3.300     | 0.051      | 0.0002     | 184 | 0.46  |
| Fourth quartile (>0.14)                                                       | -3.155     | 0.049      | 0.0054     | 186 | 0.76  |
| <i>Boreal Forest - Control</i>                                                |            |            |            |     |       |
| First quartile (<0.21)                                                        | -0.147     | 0.110      | na         | 40  | 0.90  |
| Second quartile (0.21-0.245)                                                  | -0.150     | 0.120      | na         | 40  | 0.94  |
| Third quartile (0.245-0.284)                                                  | -0.014     | 0.108      | na         | 40  | 0.94  |
| Fourth quartile (>0.284)                                                      | 0.026      | 0.100      | na         | 40  | 0.72  |
| <i>Boreal Forest - Warmed</i>                                                 |            |            |            |     |       |
| First quartile (<0.186)                                                       | -0.308     | 0.099      | na         | 77  | 0.85  |
| Second quartile (0.186-0.226)                                                 | -0.069     | 0.100      | na         | 77  | 0.82  |
| Third quartile (0.226-0.263)                                                  | -0.067     | 0.103      | na         | 76  | 0.90  |
| Fourth quartile (>0.263)                                                      | 0.106      | 0.087      | na         | 76  | 0.75  |
| <i>Temperate Forest</i>                                                       |            |            |            |     |       |
| First quartile (<0.176)                                                       | 0.530      | 0.002      | 0.0013     | 124 | 0.20  |
| Second quartile (0.176-0.233)                                                 | -1.800     | 0.232      | -0.0040    | 128 | 0.68  |
| Third quartile (0.223-0.279)                                                  | -1.126     | 0.176      | -0.0024    | 120 | 0.64  |
| Fourth quartile (>0.279)                                                      | -0.672     | 0.140      | -0.0019    | 125 | 0.54  |
| <i>Northern Shrubland</i>                                                     |            |            |            |     |       |
| First quartile (<0.2157)                                                      | -1.183     | 0.145      | na         | 86  | 0.83  |
| Second quartile (0.2157-0.389)                                                | -1.167     | 0.144      | na         | 86  | 0.57  |
| Third quartile (0.389-0.458)                                                  | -1.106     | 0.128      | na         | 86  | 0.37  |
| Fourth quartile (>0.458)                                                      | -1.115     | 0.132      | na         | 86  | 0.45  |
| <i>Southern Shrubland</i>                                                     |            |            |            |     |       |
| First quartile (<0.1128)                                                      | -1.990     | 0.114      | -0.0012    | 26  | 0.31  |
| Second quartile (0.1128-0.199)                                                | -3.200     | 0.230      | -0.0031    | 25  | 0.54  |
| Third quartile (0.199-0.2898)                                                 | -1.505     | 0.167      | -0.0040    | 25  | 0.37  |
| Fourth quartile (>0.2898)                                                     | -1.560     | 0.228      | -0.0042    | 26  | 0.55  |
| <i>Grassland</i>                                                              |            |            |            |     |       |
| First quartile (<0.141)                                                       | -0.990     | 0.195      | -0.0040    | 141 | 0.29  |
| Second quartile (0.141-0.23)                                                  | -1.240     | 0.156      | -0.0020    | 142 | 0.68  |
| Third quartile (0.23-0.29)                                                    | -0.827     | 0.104      | 0.0006     | 142 | 0.47  |
| Fourth quartile (>0.291)                                                      | -1.570     | 0.175      | -0.0020    | 141 | 0.52  |
| <i>Temperate Agriculture</i>                                                  |            |            |            |     |       |
| First quartile (<0.151)                                                       | -2.816     | 0.310      | -0.0070    | 65  | 0.74  |
| Second quartile (0.151-0.198)                                                 | -3.810     | 0.431      | -0.0100    | 66  | 0.78  |
| Third quartile (0.198-0.25)                                                   | -3.126     | 0.264      | -0.0039    | 65  | 0.62  |
| Fourth quartile (>0.25)                                                       | -2.530     | 0.207      | -0.0026    | 66  | 0.76  |

382  
383 Parameters for models of natural log (ln) respiration ( $\mu\text{mol C m}^{-2} \text{s}^{-1}$ ) as a function of soil temperature

384 ( $^{\circ}\text{C}$ ) by moisture quartile for each biome. Data also shown in Fig. S3.

385 **Table S5**

| Model                                              | $\gamma_0 \pm \text{SE}$ | $\gamma_1 \pm \text{SE}$ | $\gamma_2 \pm \text{SE}$ | n    | R <sup>2</sup> |
|----------------------------------------------------|--------------------------|--------------------------|--------------------------|------|----------------|
| <i>All Biomes Except Desert</i>                    |                          |                          |                          |      |                |
| $\ln(R) \sim \gamma_0 + \gamma_1 T$                | -0.445 ± 0.038           | 0.072 ± 0.002            | na                       | 2343 | 0.30           |
| $\ln(R) \sim \gamma_0 + \gamma_1 T + \gamma_2 T^2$ | -1.302 ± 0.059           | 0.204 ± 0.008            | -0.0041 ± 0.0002         | 2343 | 0.39           |
| <i>Desert</i>                                      |                          |                          |                          |      |                |
| $\ln(R) \sim \gamma_0 + \gamma_1 T$                | -2.970 ± 0.032           | 0.042 ± 0.002            | na                       | 1474 | 0.34           |
| $\ln(R) \sim \gamma_0 + \gamma_1 T + \gamma_2 T^2$ | -2.993 ± 0.047           | 0.046 ± 0.006            | -0.0001 ± 0.0002         | 1474 | 0.34           |
| <i>Boreal Forest</i>                               |                          |                          |                          |      |                |
| $\ln(R) \sim \gamma_0 + \gamma_1 T$                | 0.003 ± 0.031            | 0.095 ± 0.002            | na                       | 466  | 0.82           |
| $\ln(R) \sim \gamma_0 + \gamma_1 T + \gamma_2 T^2$ | -0.170 ± 0.060           | 0.127 ± 0.010            | -0.0012 ± 0.0004         | 466  | 0.82           |
| <i>Temperate Forest</i>                            |                          |                          |                          |      |                |
| $\ln(R) \sim \gamma_0 + \gamma_1 T$                | -0.288 ± 0.061           | 0.076 ± 0.004            | na                       | 497  | 0.49           |
| $\ln(R) \sim \gamma_0 + \gamma_1 T + \gamma_2 T^2$ | -0.803 ± 0.136           | 0.146 ± 0.017            | -0.0022 ± 0.0005         | 497  | 0.51           |
| <i>Northern Shrubland</i>                          |                          |                          |                          |      |                |
| $\ln(R) \sim \gamma_0 + \gamma_1 T$                | -1.171 ± 0.057           | 0.142 ± 0.006            | na                       | 344  | 0.63           |
| $\ln(R) \sim \gamma_0 + \gamma_1 T + \gamma_2 T^2$ | -1.176 ± 0.100           | 0.143 ± 0.024            | -0.0001 ± 0.0013         | 344  | 0.63           |
| <i>Southern Shrubland</i>                          |                          |                          |                          |      |                |
| $\ln(R) \sim \gamma_0 + \gamma_1 T$                | -0.132 ± 0.145           | 0.026 ± 0.006            | na                       | 102  | 0.15           |
| $\ln(R) \sim \gamma_0 + \gamma_1 T + \gamma_2 T^2$ | -1.020 ± 0.317           | 0.118 ± 0.030            | -0.0020 ± 0.0006         | 102  | 0.23           |
| <i>Grassland</i>                                   |                          |                          |                          |      |                |
| $\ln(R) \sim \gamma_0 + \gamma_1 T$                | -0.654 ± 0.070           | 0.077 ± 0.004            | na                       | 566  | 0.45           |
| $\ln(R) \sim \gamma_0 + \gamma_1 T + \gamma_2 T^2$ | -1.531 ± 0.120           | 0.202 ± 0.015            | -0.0035 ± 0.0004         | 566  | 0.51           |
| <i>Temperate Agriculture</i>                       |                          |                          |                          |      |                |
| $\ln(R) \sim \gamma_0 + \gamma_1 T$                | -2.166 ± 0.097           | 0.134 ± 0.006            | na                       | 262  | 0.66           |
| $\ln(R) \sim \gamma_0 + \gamma_1 T + \gamma_2 T^2$ | -3.025 ± 0.138           | 0.304 ± 0.022            | -0.0063 ± 0.0008         | 262  | 0.72           |

386

387 Parameters for multivariate regression model of soil respiration (natural log, in  $\mu\text{mol C m}^{-2} \text{s}^{-1}$ ) ( $R$ ) as a  
 388 function of soil temperature ( $^{\circ}\text{C}$ ) ( $T$ ), including data from both control and warmed treatments (Models a  
 389 and b in Table S3). Parameters shown for both the log-linear and log-quadratic temperature response  
 390 functions. n = sample size, R<sup>2</sup> = correlation coefficient. Parameter units:  $\gamma_0 = \ln \mu\text{mol C m}^{-2} \text{s}^{-1}$ ;  $\gamma_1 = ^{\circ}\text{C}^{-1}$ ,  $\gamma_2$   
 391 =  $^{\circ}\text{C}^{-2}$ . All models significant ( $p < 0.001$ ). For comparison of model fits, see Table S3. For model  
 392 parameters of control versus warmed plots, see Table 1.

393

394 **Table S6.**  
395

| <b>Comparison of Model Fits (R<sup>2</sup>)</b> |       |       |
|-------------------------------------------------|-------|-------|
| Biome Type                                      | Eq. 3 | Eq. 4 |
| All non-desert                                  | 0.39  | 0.33  |
| Desert                                          | 0.42  | 0.40  |
| Boreal Forest                                   | 0.82  | 0.80  |
| Temperate Forest                                | 0.51  | 0.44  |
| Northern Shrubland                              | 0.63  | 0.53  |
| Southern Shrubland (no Hungary)                 | 0.60  | 0.13  |
| Southern Shrubland (includes Hungary)           | 0.60  | 0.03  |
| Grassland                                       | 0.52  | 0.39  |
| Agriculture                                     | 0.72  | 0.63  |

396  
397  
398  
399

Comparison of model fits (Eq. 3, Eq. 4) evaluating role of soil moisture in driving soil respiration.
